# Supplementary material for: Probiotic Enrichment and Reduction of Aflatoxins in a Traditional African Maize-Based Fermented Food
Source: MDPI journal article supplement (doi:10.3390/nu11020265), 2019-01-25
Supplement: s1 [file s1]

# Supplementary Materials

## 1. fit

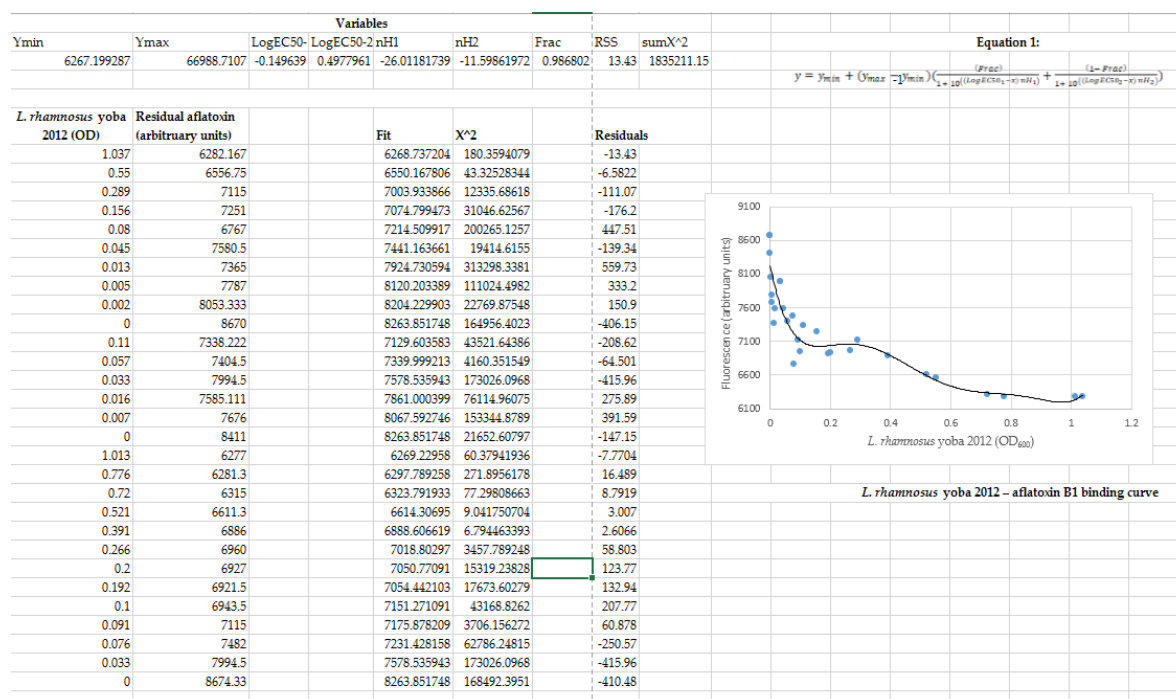

## 2. residuals

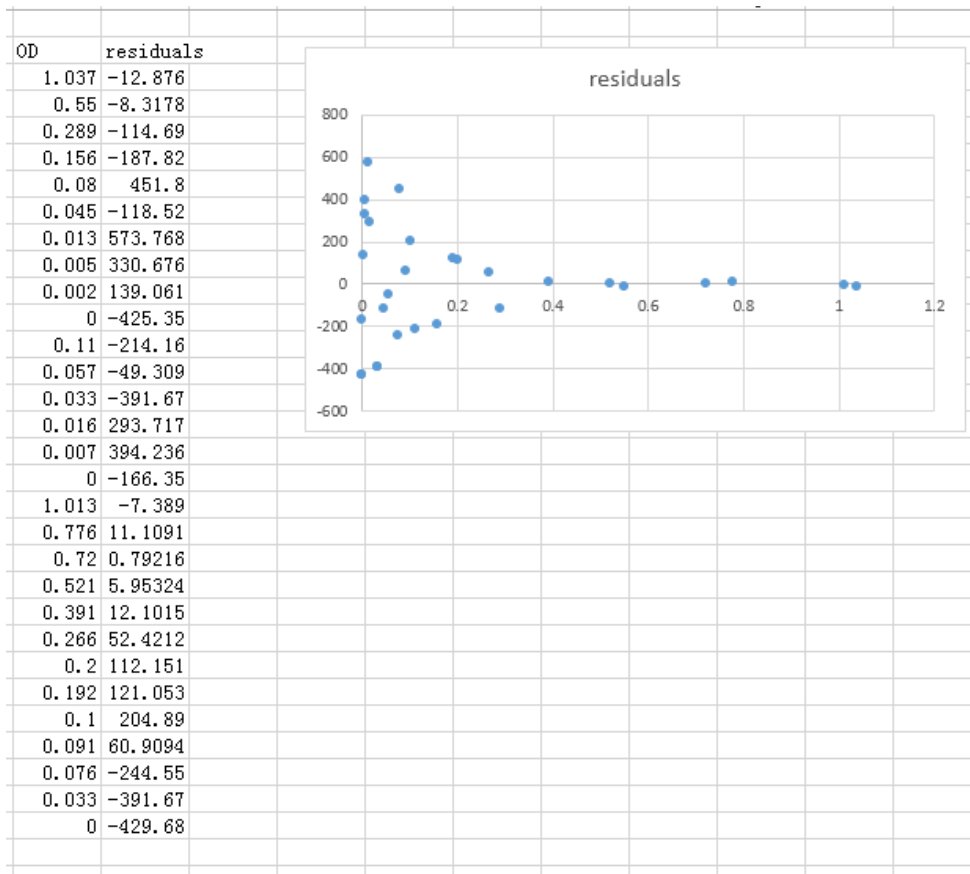

### 3. Calculated r2

| L. rhamn | Residual aflatoxin (arbitrary)        | Fit     | (Residual aflatoxin - Fit) squared | aflatoxin -mean of residual aflatoxin) |
|----------|---------------------------------------|---------|------------------------------------|----------------------------------------|
| 1.037    | 6282.167                              | 6268.74 | 180.3594079                        | 1002944.924                            |
| 0.55     | 6556.75                               | 6550.17 | 43.32528344                        | 528366.716                             |
| 0.289    | 7115                                  | 7003.93 | 12335.68618                        | 28438.90298                            |
| 0.156    | 7251                                  | 7074.8  | 31046.62567                        | 1065.263804                            |
| 0.08     | 6767                                  | 7214.51 | 200265.1257                        | 266915.215                             |
| 0.045    | 7580.5                                | 7441.16 | 19414.6155                         | 88126.82184                            |
| 0.013    | 7365                                  | 7924.73 | 313298.3381                        | 6619.713321                            |
| 0.005    | 7787                                  | 8120.2  | 111024.4982                        | 253372.9212                            |
| 0.002    | 8053.333                              | 8204.23 | 22769.87548                        | 592429.8091                            |
| 0        | 8670                                  | 8263.85 | 164956.4023                        | 1921998.543                            |
| 0.11     | 7338.222                              | 7129.6  | 43521.64386                        | 2979.371648                            |
| 0.057    | 7404.5                                | 7340    | 4160.351549                        | 14607.53136                            |
| 0.033    | 7994.5                                | 7578.54 | 173026.0968                        | 505324.2438                            |
| 0.016    | 7585.111                              | 7861    | 76114.96075                        | 90885.74103                            |
| 0.007    | 7676                                  | 8067.59 | 153344.8789                        | 153947.6414                            |
| 0        | 8411                                  | 8263.85 | 21652.60797                        | 1270944.224                            |
| 1.013    | 6277                                  | 6269.23 | 60.37941936                        | 1013320.827                            |
| 0.776    | 6281.3                                | 6297.79 | 271.8956178                        | 1004682.227                            |
| 0.72     | 6315                                  | 6323.79 | 77.29808663                        | 938260.3099                            |
| 0.521    | 6611.3                                | 6614.31 | 9.041750704                        | 452038.8963                            |
| 0.391    | 6886                                  | 6888.61 | 6.794463393                        | 158116.2807                            |
| 0.266    | 6960                                  | 7018.8  | 3457.789248                        | 104741.8006                            |
| 0.2      | 6927                                  | 7050.77 | 15319.23828                        | 127190.9336                            |
| 0.192    | 6921.5                                | 7054.44 | 17673.60279                        | 131144.2058                            |
| 0.1      | 6943.5                                | 7151.27 | 43168.8262                         | 115694.1171                            |
| 0.091    | 7115                                  | 7175.88 | 3706.156272                        | 28438.90298                            |
| 0.076    | 7482                                  | 7231.43 | 62786.24815                        | 39347.33256                            |
| 0.033    | 7994.5                                | 7578.54 | 173026.0968                        | 505324.2438                            |
| 0        | 8674.33                               | 8263.85 | 168492.3951                        | 1934023.184                            |
| Mean     | 7283.638379                           | Total   | 1835211.154                        | 13281290.84                            |
|          |                                       |         |                                    |                                        |
|          |                                       |         |                                    |                                        |
|          | The percentage of total variation not |         | 0.13818018                         |                                        |
|          |                                       | R2 =    | 0.86181982                         |                                        |

#### 4. Total binding sites per bacteri

|                                                                                                  |                                                                     |
|--------------------------------------------------------------------------------------------------|---------------------------------------------------------------------|
| calculated from the minimum value for Y (Ymin) using the equation from the standard curve below. |                                                                     |
| Ymin                                                                                             | 6267.2                                                              |
| n ( <i>L. rhamnosus</i> yoba 2012 corresponding to Ymin) (OD600)                                 | $1.8.0 \times 10^8$ cfu (average of three independent plate counts) |
| Aflatoxin B <sub>1</sub> used in the experiment ( $\mu\text{g ml}^{-1}$ )                        | 1                                                                   |
| <b>Data used for development of standard curve</b>                                               |                                                                     |
|                                                                                                  | Fluorescence (arbitrary units)                                      |
| Aflatoxin B <sub>1</sub> ( $\mu\text{g ml}^{-1}$ )                                               | trail 1 trail 2 trail 3 Mean                                        |
| 10                                                                                               | 11134 12495 12709 12112.7                                           |
| 5                                                                                                | 9142 9325 9234 9233.67                                              |
| 1                                                                                                | 6767 7281 7314 7120.67                                              |
| 0.5                                                                                              | 6134 6533 6608 6425                                                 |
| 0.01                                                                                             | 6366 6316 6308 6330                                                 |
| 0                                                                                                | 5893 6029 6165 6029                                                 |

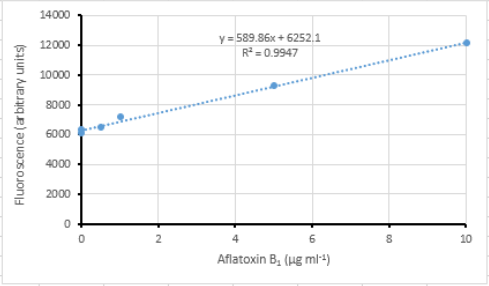

Standard curve of aflatoxin B1 ( $\mu\text{g ml}^{-1}$ )

|                                                                                                      |                        |
|------------------------------------------------------------------------------------------------------|------------------------|
| From the standard curve, the concentration of free aflatoxin B <sub>1</sub> = (Ymin - 6252.1)/589.86 |                        |
| free aflatoxin B <sub>1</sub> (unbound)                                                              | 0.025598086            |
| <i>L. rhamnosus</i> yoba 2012 corresponding to bound aflatoxin (Bmax) ( $\mu$ )                      | 800000000 0.974401914  |
| Avogadro's constant ( $\text{mol}^{-1}$ )                                                            | $6.022 \times 10^{23}$ |
| The total number of aflatoxin binding sites per bacterium (M) =                                      |                        |
| M                                                                                                    | 2348642.463            |
